# Supplementary material for: Cecil: A Moment or a Movement? Analysis of Media Coverage of the Death of a Lion, Panthera leo
Source: MDPI journal article supplement (doi:10.3390/ani6050026), 2016-04-25
Supplement: s1 [file s1]

# Supplementary Materials: Cecil: A Moment or a Movement? Analysis of Media Coverage of the Death of a Lion, *Panthera Leo*

David W. Macdonald, Kim S. Jacobsen, Dawn Burnham, Paul J. Johnson and Andrew J. Loveridge

## 1. List of Languages

Table S1. List of languages.

| Languages Searched by Meltwater News | Languages Unable to be Searched by Meltwater News |
|--------------------------------------|---------------------------------------------------|
| Afrikaans                            | Amharic                                           |
| Akan                                 | Bhojpuri                                          |
| Albanian                             | Burmese                                           |
| Arabic                               | Chhattisgarhi                                     |
| Armenian                             | Deccan                                            |
| Assamese                             | Dhivehi                                           |
| Asturian                             | Gujarati                                          |
| Awadhi                               | Haryanvi                                          |
| Azerbaijani                          | Kannada                                           |
| Balochi                              | Khmer                                             |
| Basque                               | Lao                                               |
| Bavarian                             | Madurese                                          |
| Belarusian                           | Malayalam                                         |
| Bengali                              | Marwari                                           |
| Breton                               | Mossi                                             |
| Bulgarian                            | Oriya                                             |
| Cantonese                            | Punjabi                                           |
| Catalan                              | Sinhalese                                         |
| Cebuano                              | Sylheti                                           |
| Central Khmer                        | Telugu                                            |
| Chewa                                | Tibetan                                           |
| Chinese                              |                                                   |
| Chittagonian                         |                                                   |
| Colognian                            |                                                   |
| Czech                                |                                                   |
| Danish                               |                                                   |
| Dhundhari                            |                                                   |
| Dutch                                |                                                   |
| Emiliano-Romagnolo                   |                                                   |
| English                              |                                                   |
| Esperanto                            |                                                   |
| Estonian                             |                                                   |
| Faroese                              |                                                   |
| Fiji Hindi                           |                                                   |
| Filipino                             |                                                   |
| Finnish                              |                                                   |
| French                               |                                                   |
| Fula                                 |                                                   |
| Galician                             |                                                   |
| Gan                                  |                                                   |
| Georgian                             |                                                   |
| German                               |                                                   |
| Greek                                |                                                   |
| Haitian                              |                                                   |
| Hakka                                |                                                   |
| Hausa                                |                                                   |
| Hebrew                               |                                                   |
| Hiligaynon                           |                                                   |
| Hindi                                |                                                   |
| Hmong                                |                                                   |

Table S1. Cont.

| Languages Searched by Meltwater News | Languages Unable to be Searched by Meltwater News |
|--------------------------------------|---------------------------------------------------|
|                                      | Hungarian                                         |
|                                      | Icelandic                                         |
|                                      | Ido                                               |
|                                      | Igbo                                              |
|                                      | Ilokano                                           |
|                                      | Interlingua                                       |
|                                      | Irish                                             |
|                                      | Italian                                           |
|                                      | Japanese                                          |
|                                      | Javanese                                          |
|                                      | Kazakh                                            |
|                                      | Kinyarwanda                                       |
|                                      | Kirundi                                           |
|                                      | Konkani                                           |
|                                      | Korean                                            |
|                                      | Kurdish                                           |
|                                      | Latvian                                           |
|                                      | Limburgan                                         |
|                                      | Lithuanian                                        |
|                                      | Lombard                                           |
|                                      | Luxembourgish                                     |
|                                      | Macedonian                                        |
|                                      | Magahi                                            |
|                                      | Maithili                                          |
|                                      | Malagasy                                          |
|                                      | Malay                                             |
|                                      | Maltese                                           |
|                                      | Marathi                                           |
|                                      | Min bei                                           |
|                                      | Min dong                                          |
|                                      | Min nan                                           |
|                                      | Mongolian                                         |
|                                      | Neapolitan                                        |
|                                      | Nepali                                            |
|                                      | Norwegian                                         |
|                                      | Occitan                                           |
|                                      | Oromo                                             |
|                                      | Pashto                                            |
|                                      | Persian                                           |
|                                      | Polish                                            |
|                                      | Portuguese                                        |
|                                      | Quechua                                           |
|                                      | Romanian                                          |
|                                      | Romansh                                           |
|                                      | Russian                                           |
|                                      | Saraiki                                           |
|                                      | Scottish Gaelic                                   |
|                                      | Serbo-Croatian                                    |
|                                      | Shona                                             |
|                                      | Sicilian                                          |
|                                      | Sindhi                                            |
|                                      | Slovak                                            |
|                                      | Slovenian                                         |
|                                      | Somali                                            |
|                                      | Spanish                                           |
|                                      | Sundanese                                         |
|                                      | Swahili                                           |
|                                      | Swedish                                           |
|                                      | Tamil                                             |
|                                      | Thai                                              |
|                                      | Turkish                                           |
|                                      | Turkmen                                           |

Table S1. Cont.

| Languages Searched by Meltwater News | Languages Unable to be Searched by Meltwater News |
|--------------------------------------|---------------------------------------------------|
|                                      | Ukrainian                                         |
|                                      | Urdu                                              |
|                                      | Uyghur                                            |
|                                      | Uzbek                                             |
|                                      | Vietnamese                                        |
|                                      | Welsh                                             |
|                                      | Wu                                                |
|                                      | Xhosa                                             |
|                                      | Xiang                                             |
|                                      | Yiddish                                           |
|                                      | Yoruba                                            |
|                                      | Zhuang                                            |
|                                      | Zulu                                              |

2. Hits over Time in the Editorial Media

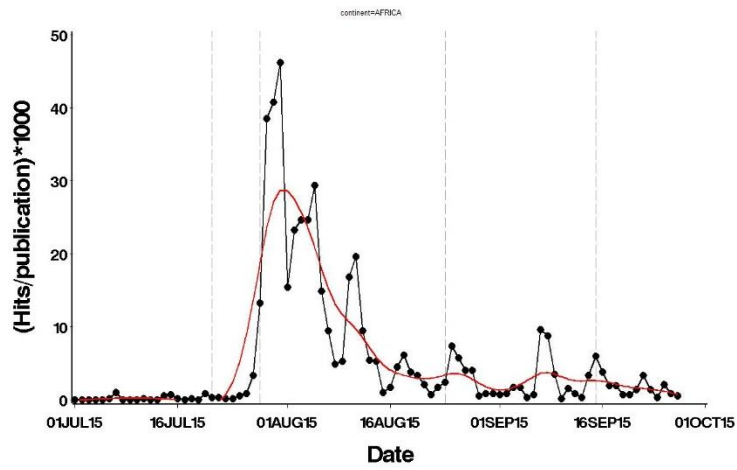

Figure S1. Hits over time in Africa.

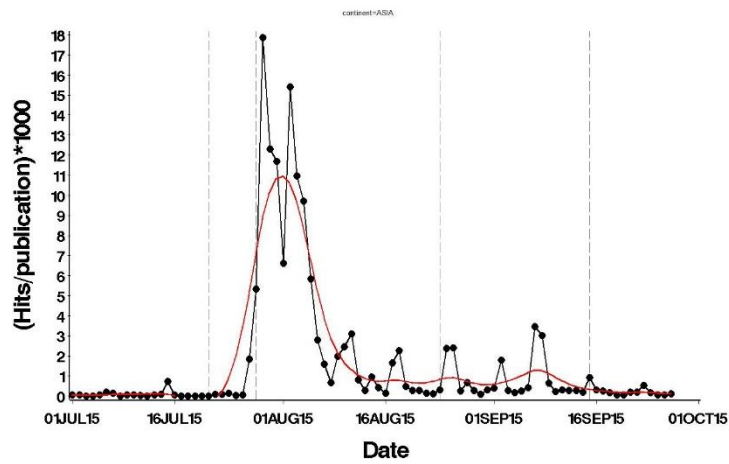

Figure S2. Hits over time in Asia.

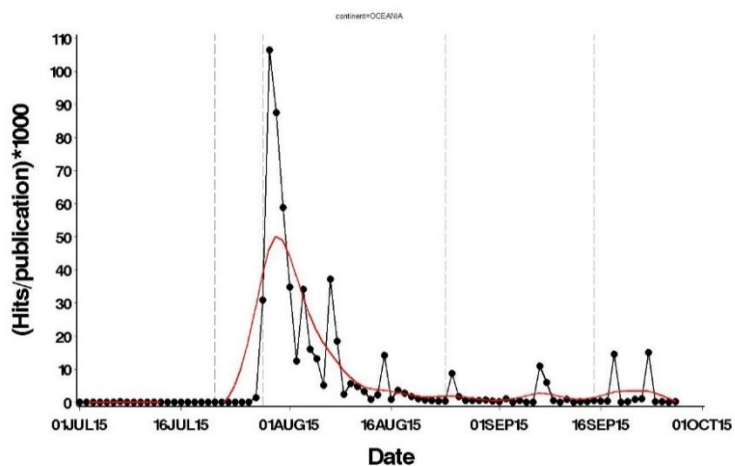

Figure S3. Hits over time in Oceania.

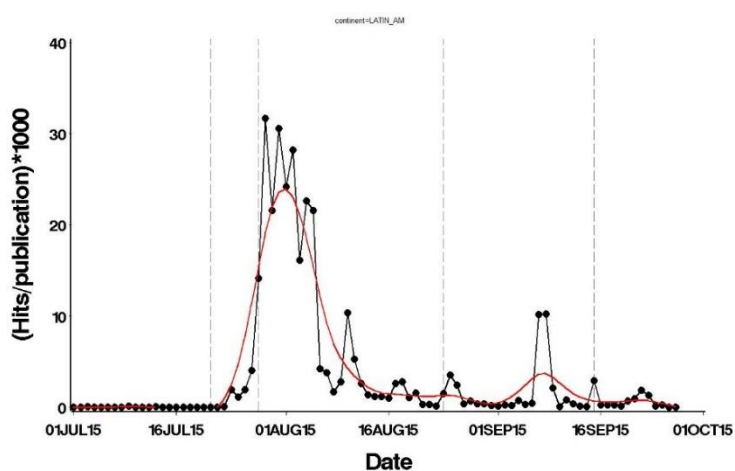

Figure S4. Hits over time in Central and South America.

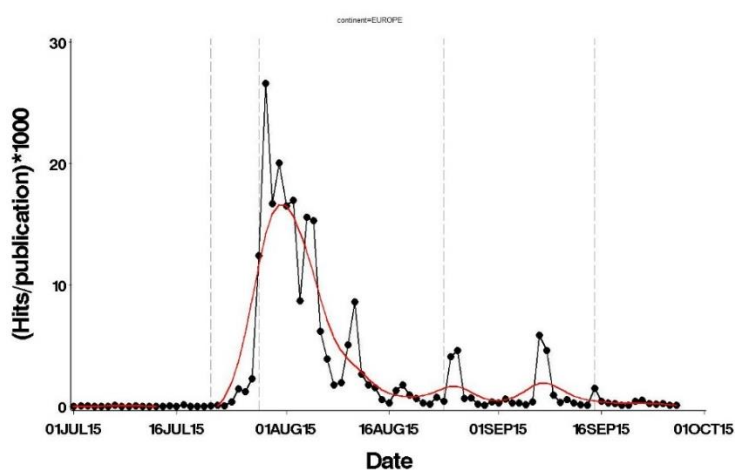

Figure S5. Hits over time in Europe.

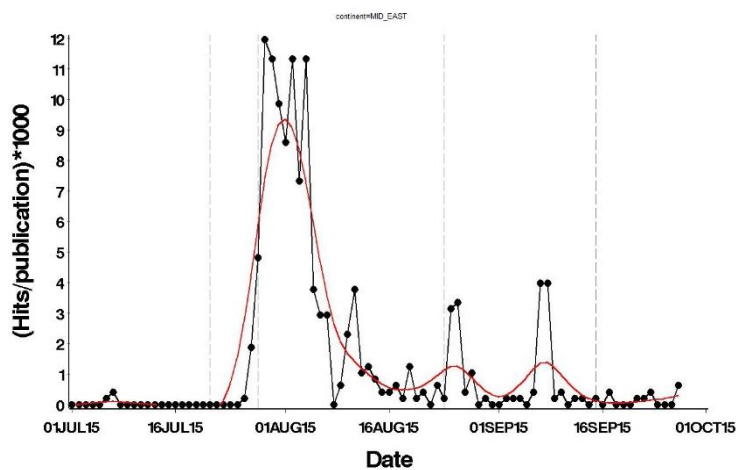

Figure S6. Hits over time in Middle East.

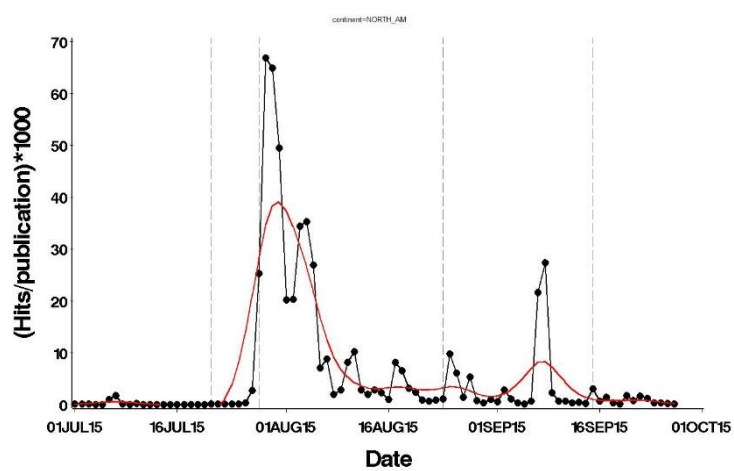

Figure S7. Hits over time in North America.

### 3. Hits over Time on Twitter, Facebook and YouTube

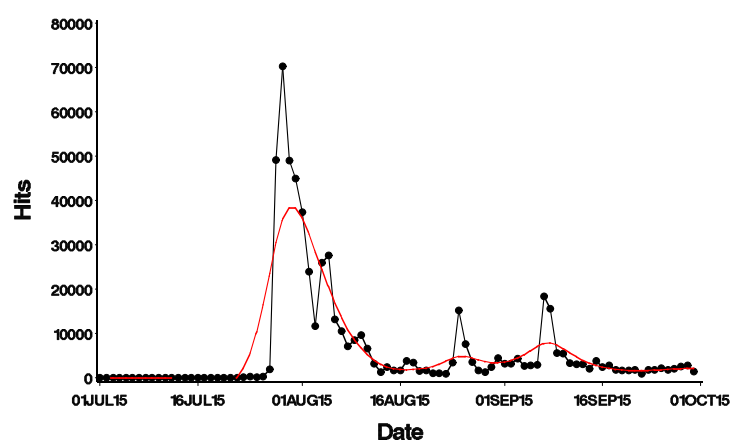

Figure S8. Hits over time on Twitter.

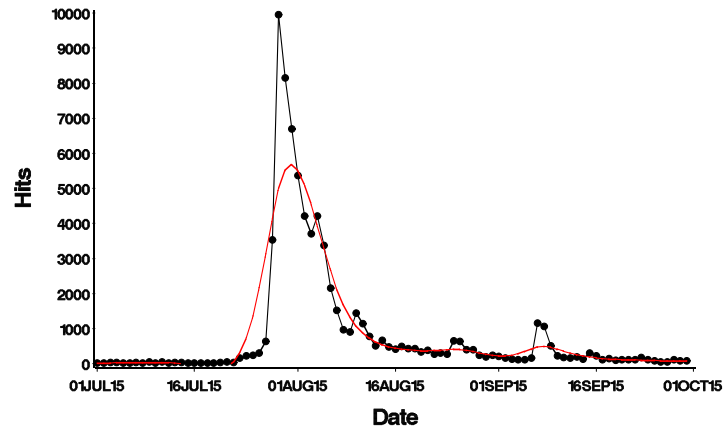

Figure S9. Hits over time on Facebook.

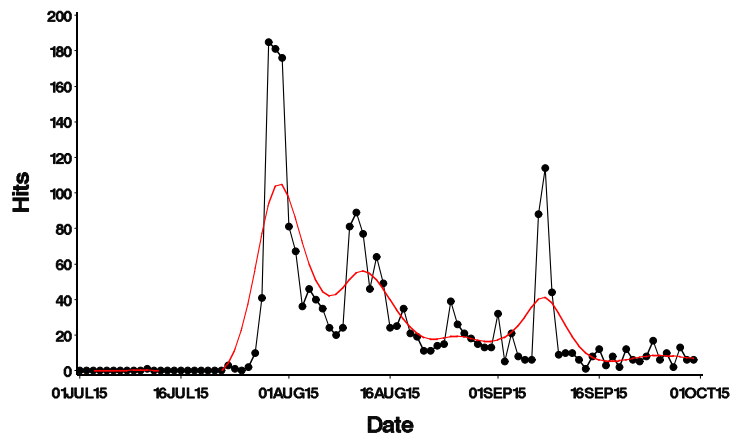

Figure S10. Hits over time on YouTube.

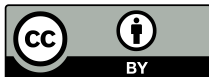

© 2016 by the authors; licensee MDPI, Basel, Switzerland. This article is an open access article distributed under the terms and conditions of the Creative Commons by Attribution (CC-BY) license (<http://creativecommons.org/licenses/by/4.0/>).
